# Supplementary material
Source: PubMed Central journal article supplement (PMC7259721)

## Supplementary Figures

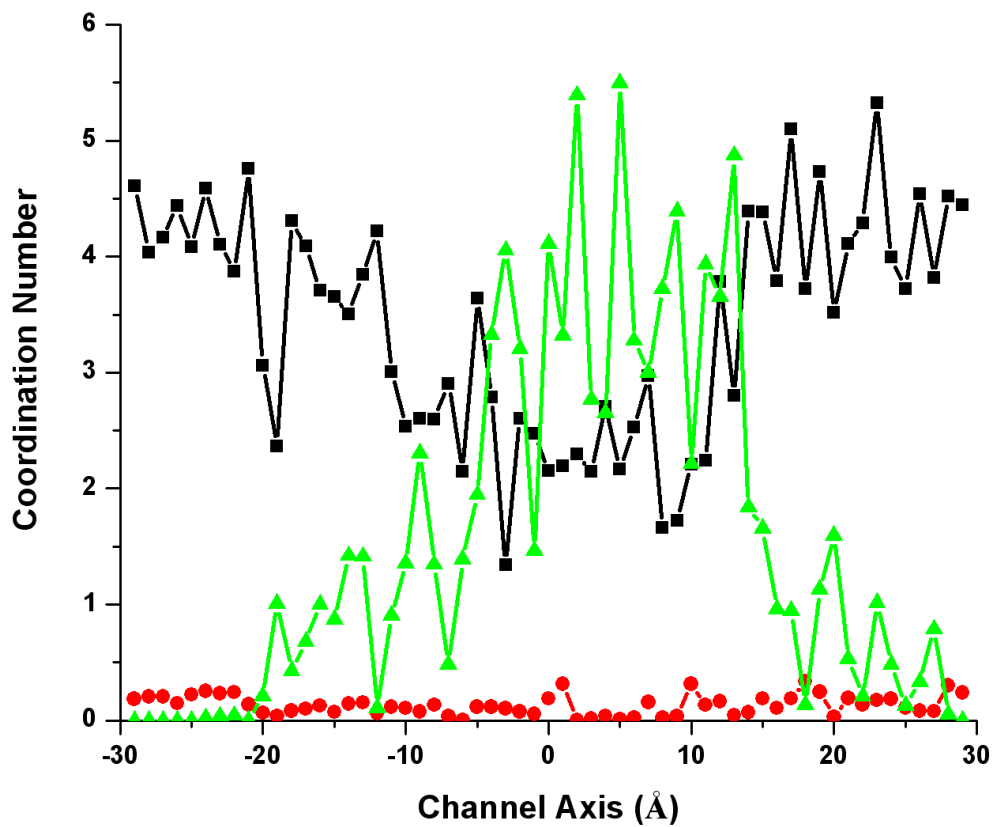

**Supplemental Figure 1:** The position-dependent coordination number of ATP molecule.  $N(K^+)$  is shown as black squares,  $N(Cl^-)$  red circles and  $N(\text{Protein})$  as green triangles. Contact analysis was performed by averaging of heavy atoms contacts within a sphere with  $R=3.5 \text{ \AA}$ .

**Supplemental Figure 2:** Interface energies of VDAC/ $\alpha$ -Tubulin Complex vs. I\_RMS from ROSETTA PROTEIN-PROTEIN Docking. The low-energy decoys chosen for further refinement with MD are shown in red. and RMSF for heavy atoms.

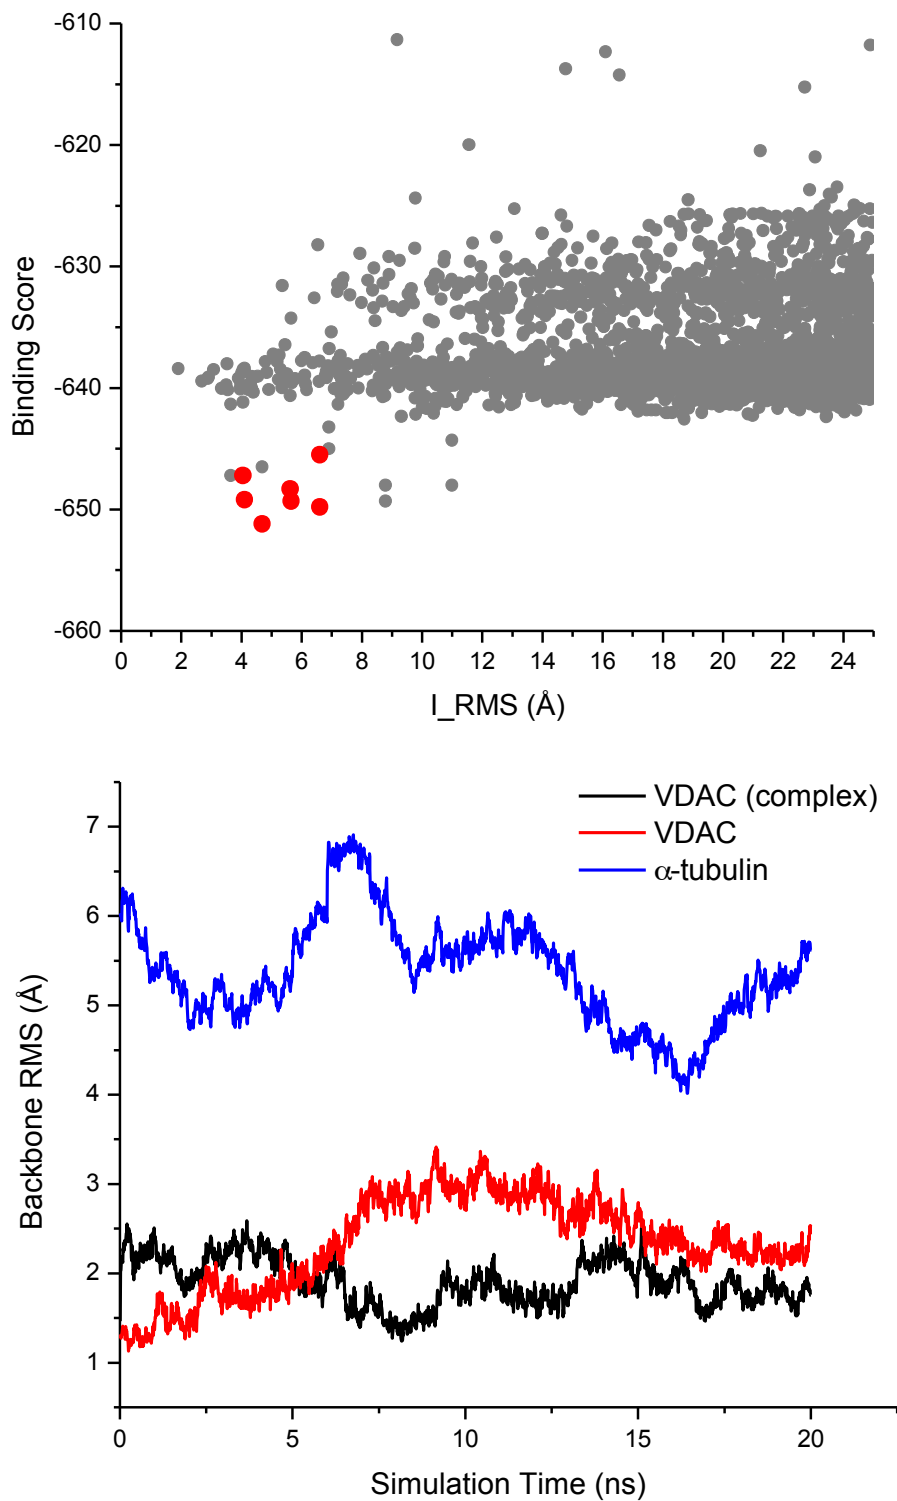

**Supplemental Figure 3:** Summary of cumulative charge transfer from five independent simulations for open VDAC1 channel. The contributions from anion and cation currents are shown.

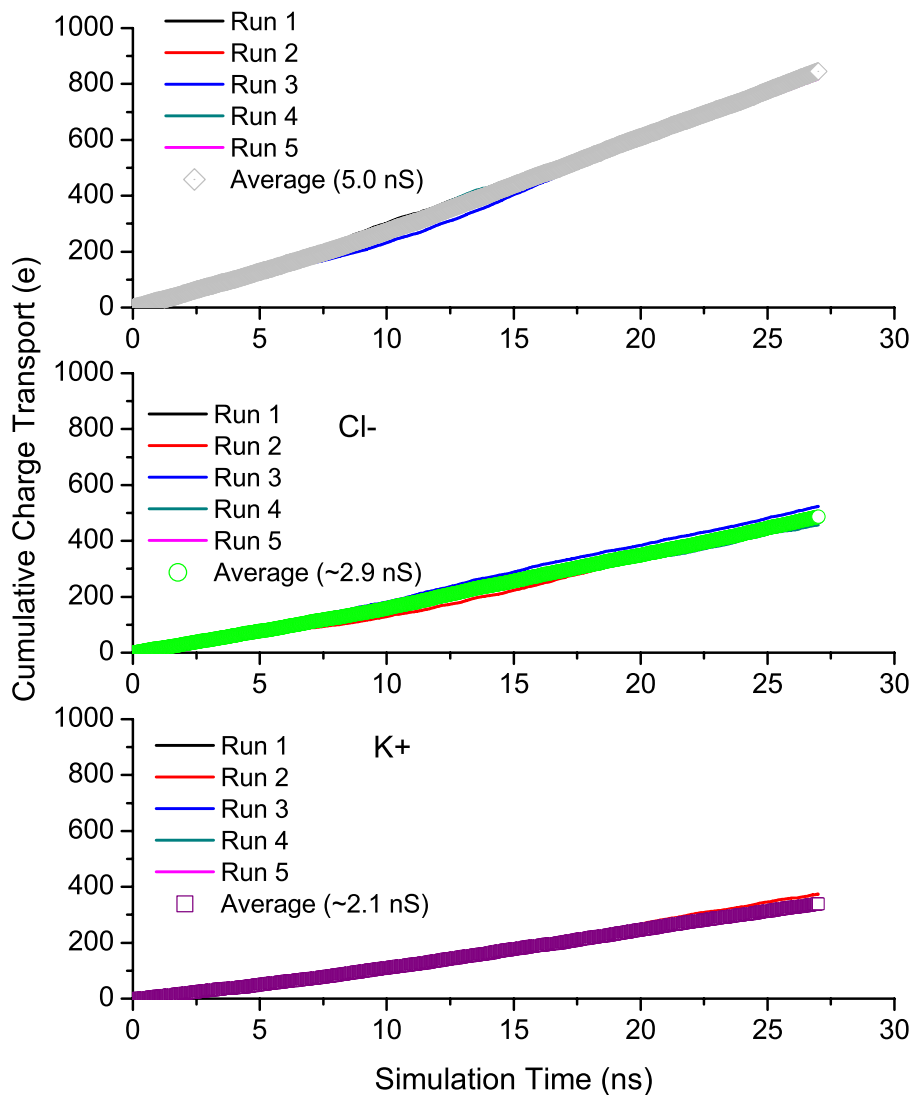

Supplement: NIHMS544449-supplement-1_si_001.pdf [file NIHMS544449-supplement-1_si_001.pdf]
